# Supplementary material for: Inhibition of NADPH oxidase by apocynin prevents learning and memory deficits in a mouse Parkinson's disease model
Source: PubMed Central journal article supplement — Redox Biol. 2019 Feb 8;22:101134. doi: 10.1016/j.redox.2019.101134 (PMC6389731; doi:10.1016/j.redox.2019.101134), 2019-02-08
Supplement: mmc1.pdf [file mmc1.pdf]

**Inhibition of NADPH oxidase by apocynin prevents learning and memory  
deficits in a mouse Parkinson's disease model**

Liyan Hou<sup>1#</sup>, Fuqiang Sun<sup>1#</sup>, Ruixue Huang<sup>1</sup>, Wei Sun<sup>1</sup>, Dan Zhang<sup>2\*\*</sup>, Qingshan  
Wang<sup>1\*</sup>

<sup>1</sup>School of Public Health, Dalian Medical University, No. 9 W. Lvshun South Road,  
Dalian 116044, China

<sup>2</sup>State Key Laboratory of Natural Products and Functions, Institute of Materia Medica,  
Chinese Academy of Medical Sciences & Peking Union Medical College, Beijing  
100050, China

<sup>#</sup>These authors contributed equally to this work.

\*Corresponding author: Qingshan Wang, School of Public Health, Dalian Medical  
University, No. 9 W. Lvshun South Road, Dalian 116044, China. E-mail:  
wangq4@126.com

\*\*Co-corresponding author

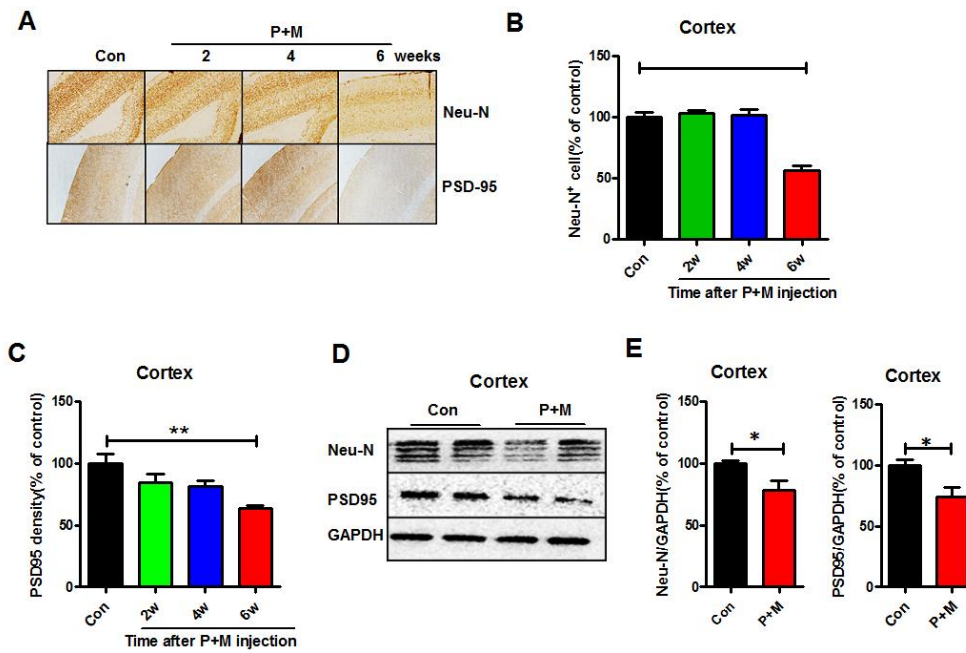

**Supplementary Fig. S1. P+M exposure induces neurodegeneration and reduction**

**of PSD-95 expression in the cortex.** (A) After 2, 4 and 6 weeks of initial P+M

treatment, neuronal nuclei and synapse in the cortex were immunostained with antibodies against Neu-N and PSD-95, respectively, and the representative images were shown.

(B) The number of Neu-N<sup>+</sup> cells in the cortex was quantified by automated counting. (C) The density of PSD-95 immunostaining in the cortex was quantified.

(D) The expressions of Neu-N and PSD-95 in the cortex were detected by using Western blot and the representative blots were shown. GAPDH was used as an internal control.

(E) The band density of Neu-N and PSD-95 blots was quantified.

\* $p < 0.05$ , \*\* $p < 0.01$ ; Scale bar = 200  $\mu\text{m}$ .

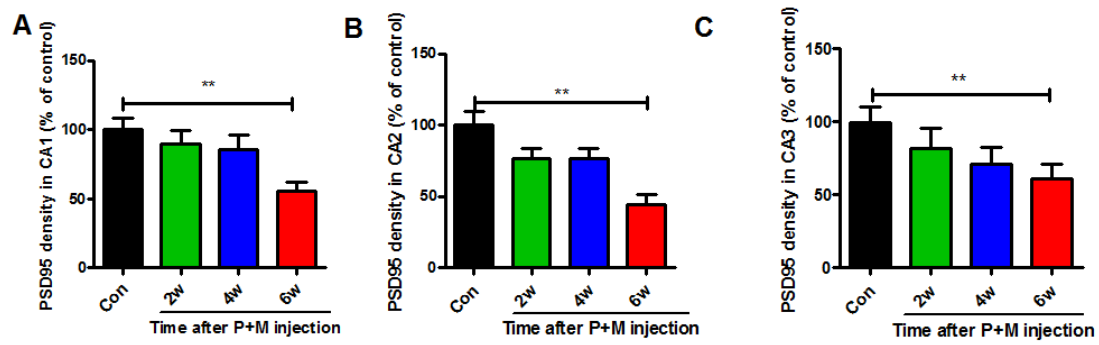

**Supplementary Fig. S2. P+M exposure induces reduction of PSD-95 in the hippocampus.** After 2, 4, and 6 weeks of initial P+M treatment, synapse in the hippocampus were immunostained with antibody against PSD-95. The density of PSD-95 immunostaining in the CA1 (A), CA2 (B) and CA3 (C) regions of hippocampus was quantified. \*\* $p < 0.01$ .

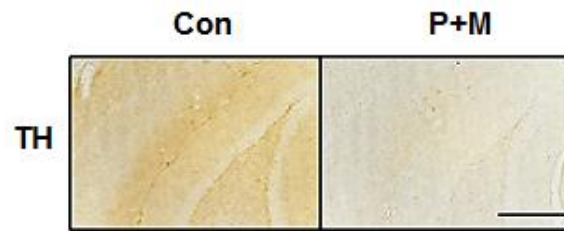

**Supplementary Fig. S3. P+M exposure induces reduction of TH expression in the hippocampus.** After 6 weeks of initial P+M treatment, the projections of dopaminergic neurons in the hippocampus was immunostained with antibody against TH and the representative images were shown.

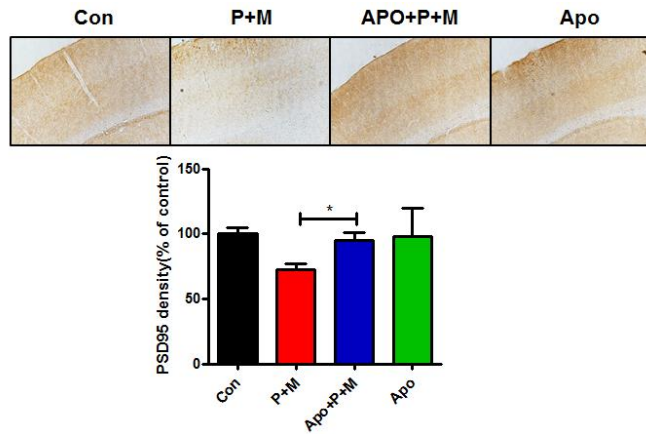

**Supplementary Fig. S4. Apocynin mitigates P+M-induced reduction of PSD-95 in the cortex.** Mice were administrated with apocynin 2 days prior to P+M treatment. After 6 weeks of initial P+M exposure, neuronal synapse in the cortex were immunostained with anti-PSD-95 antibody and the density of PSD-95 immunostaining was quantified.

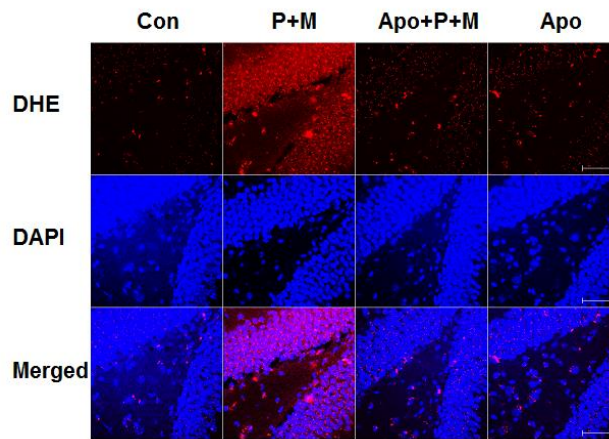

**Supplementary Fig. S5. Apocynin mitigates P+M-induced increase in DHE oxidation in the hippocampus of mice.** After 6 weeks of initial P+M exposure with or without apocynin pre-treatment, the production of superoxide in the hippocampus of mice was assessed by DHE and the representative images were shown.

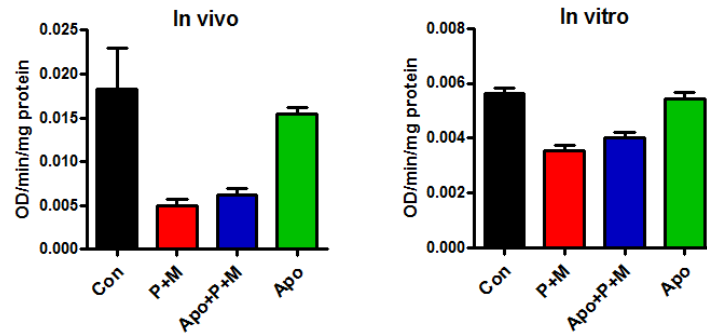

**Supplementary Fig. S6. Apocynin fails to interfere with mitochondria complex I activity in P+M-treated mice and BV2 microglial cells.** (A) After 6 weeks of initial P+M exposure with or without apocynin pre-treatment, the activities of mitochondrial complex I in the hippocampus of mice were measured by using commercial assay kits. (B) BV2 microglial cells were pre-treated with apocynin for 30 mins prior to P+M exposure. After 1h of P+M exposure, the activities of mitochondrial complex I were measured by using commercial assay kits.
